# Supplementary material for: Ruthenium-infused nickel sulphide propelling hydrogen generation via synergistic water dissociation and Volmer step promotion
Source: Royal Society of Chemistry journal article supplement (doi:10.1039/d4cc01842g), 2024-01-01
Supplement: d4cc01842g1.pdf [file d4cc01842g1.pdf]

## Electronic Supplementary material

# Ruthenium-Infused Nickel Sulphide Propelling Hydrogen Generation via Synergistic Water Dissociation and Volmer Step

*Nasrin Banu G<sup>a</sup>, Rama Prakash M<sup>a</sup>, Anantharaj Sengani<sup>b</sup>, Bernaurdshaw*

*Neppolian<sup>\*a</sup>*

*a* - Energy & Environmental Remediation Laboratory, Department of Chemistry, Faculty of Engineering & Technology, SRM institute of Science and Technology, Kattankulathur, Chennai, Tamilnadu, India, 603 203

*b* - Department of Chemistry, Indian Institute of Technology, Kanpur, Uttar Pradesh, India, 208 016

## **EXPERIMENTAL**

### **1. Materials Used**

Thioacetamide and KOH were procured from SRL chemicals, Ruthenium (III) chloride hydrate was purchased from Sigma Aldrich. Ni foam of 95% - 98% porosity was procured from Vitra technologies, India. Deionized water was used wherever required. Ethanol and acetone were used for ultrasonic segregation of NiS and RuNiS for TEM and XPS. All electrochemical characterizations were carried out with Biologic SP150 electrochemical workstation inside a Faraday cage.

### **2. Fabrication of Ru@NiS/Ni foam**

The schematic representation of fabrication of Ru@NiS/Ni foam is shown in fig. S1. A set of as-procured Ni foam pieces, each measuring 1 cm x 5 cm, were immersed in a solution comprising 40mL of water, containing 0.1M thioacetamide and 40 mM KOH. Then 100 mM of Ruthenium (III)chloride hydrate was introduced into the mixture and stirred well. Then the solution is transferred to Teflon vessels, sealed within a stainless-steel autoclave and subjected to heating at 160°C for a period of 6 hours. After cooling, the resulting Ruthenium-incorporated sulfurized Ni foam pieces were washed with water and ethanol. These modified electrodes are denoted as Ru@NiS/Ni foam, and were utilized for all subsequent electrochemical characterizations. NiS/Ni foam was also prepared for comparison using the same method without adding Ruthenium precursor.

### **3. Preparation of Pt-C/NF**

10 mg of commercial Pt-C was dispersed in 1mL solution of water-nafion-ethanol (taken in 6:3:1 volume ratio) by sonicating for 60 mins, results in uniform ink of Pt-C. About 15 $\mu$ L of

this homogenized ink was casted on 1 x 1 cm<sup>2</sup> nickel foam and dried at ambient conditions for 4 h.

#### **4. Characterization studies**

The phase and crystalline structure of NiS/Ni and Ru@NiS/Ni were meticulously characterized utilizing X-ray diffractometer (XRD) from Bruker, USA, employing Cu K $\alpha$  radiation with a wavelength of 1.5418 Å. Morphological analysis of the composites was performed using Field Emission Scanning Electron Microscopy (FE-SEM) on a Quanta 200 instrument and Transmission Electron Microscopy (TEM) on a JOEL apparatus operated at 200kV. The elemental composition of the prepared catalyst was analyzed through X-ray photoelectron spectroscopy (XPS), conducted on a k-Alpha XPS system by Thermo scientific.

#### **5. Electrochemical HER characterizations**

All HER characterizations were conducted in 1.0 M KOH solution, utilizing a Hg/HgO reference electrode and Nickel foam as counter electrode. Linear sweep voltammetry (LSV) was recorded with a sweep rate of 5 mV s<sup>-1</sup> and was iR corrected (100%) by incorporating the uncompensated resistance ( $R_u$ ) obtained from electrochemical impedance spectroscopic measurements (EIS). Tafel lines were derived from steady state voltammetry of potential -0.8 to -1.5 V vs. Hg/HgO. Chronoamperometry (CA) was performed at an overpotential of -1.2 V vs. Hg/HgO, to evaluate the endurance of Ru@NiS/Ni foam. All EIS measurements were carried out at -1.1 V vs. Hg/HgO, a potential at which the studied electrodes exhibited significant HER activity within the frequency range of 100 kHz to 0.1 Hz. The AC perturbation sine wave amplitude was consistently set at 10 mV for all EIS measurements. Cyclic voltammetry (CV) responses of Ni foam, NiS/Ni foam and Ru@NiS/Ni foam electrodes were obtained with increasing scan rates in the region of -1.0 to -0.85 V vs. Hg/HgO to determine double layer capacitance ( $C_{dl}$ ), a key parameter indicative of electrochemically active surface area (ECSA).

Potentials were transformed to the reversible hydrogen electrode (RHE) scale where necessary. The subsequent discussion delves into the results of electrochemical and material characterizations, revealing the pivotal role of Ru incorporation for enhancing the alkaline HER performance of NiS/Ni foam.

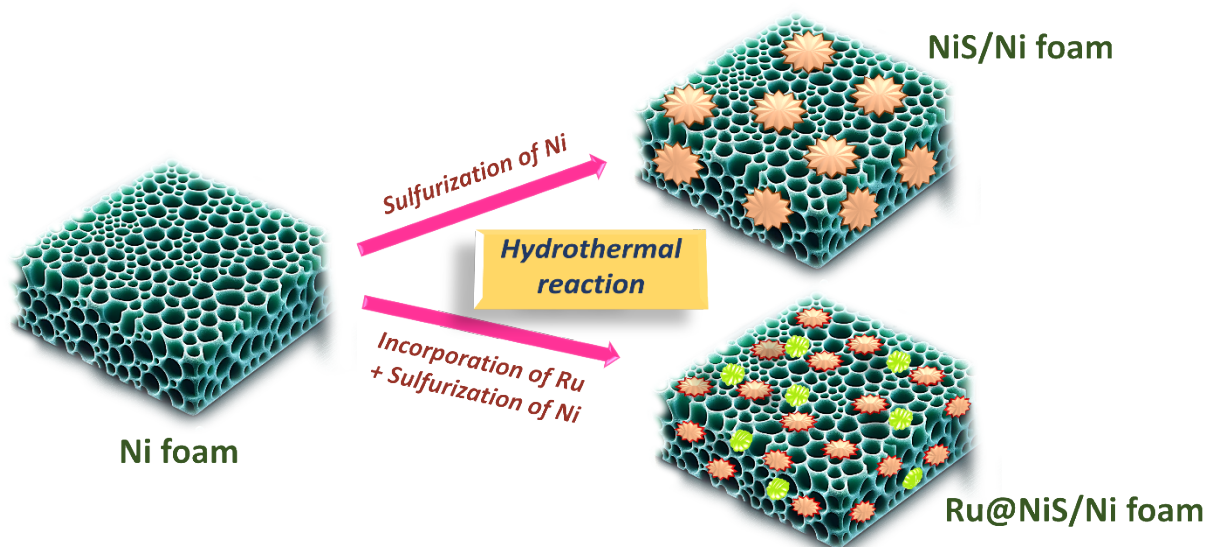

**Fig. S1.** Schematic representation of formation Ru incorporated NiS on Ni foam

## Supporting figures and tables

### 6. Morphology

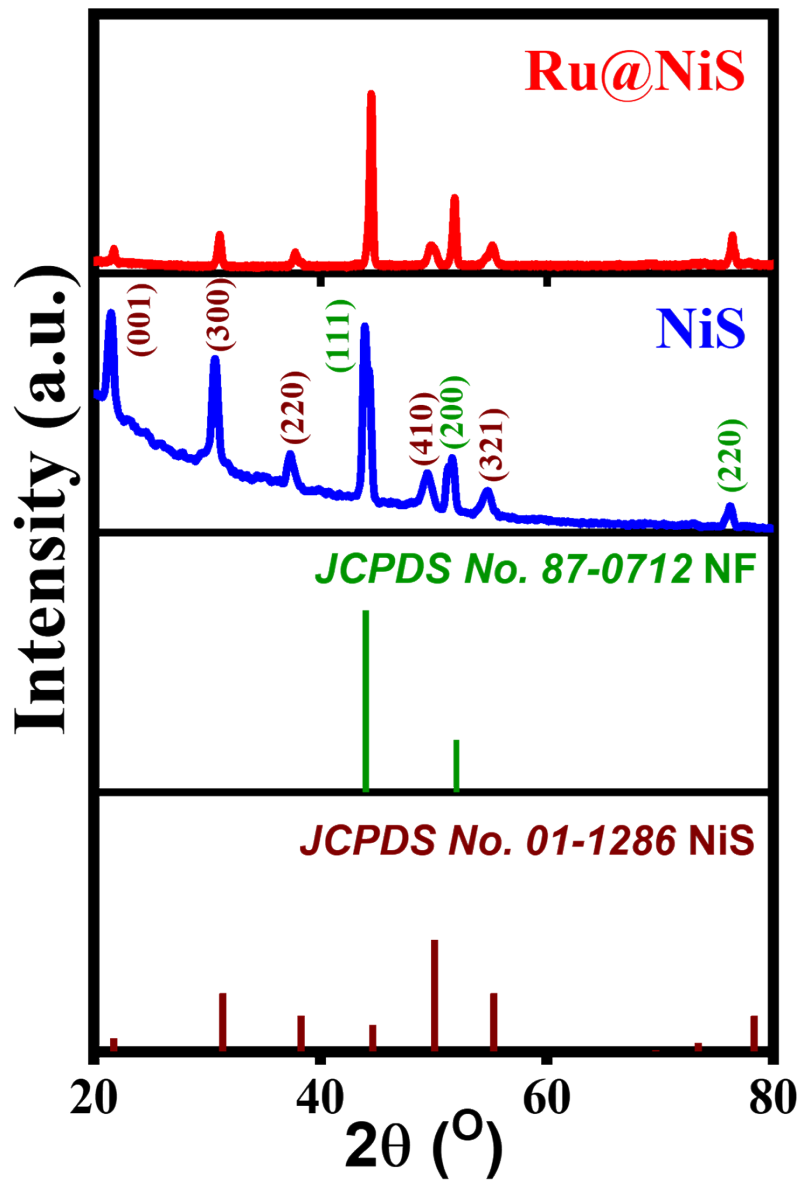

Fig. S2. XRD patterns of NiS/Ni foam and Ru@NiS/Ni foam.

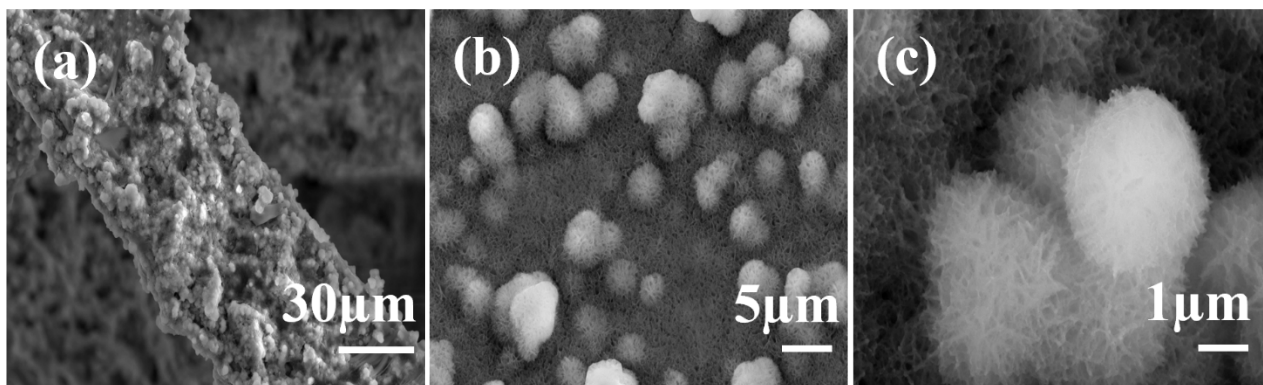

Fig. S3. (a-c) SEM images of NiS/Ni foam with increasing magnification.

### 7. Effect of concentration of Ru on HER activity of NiS/Ni foam

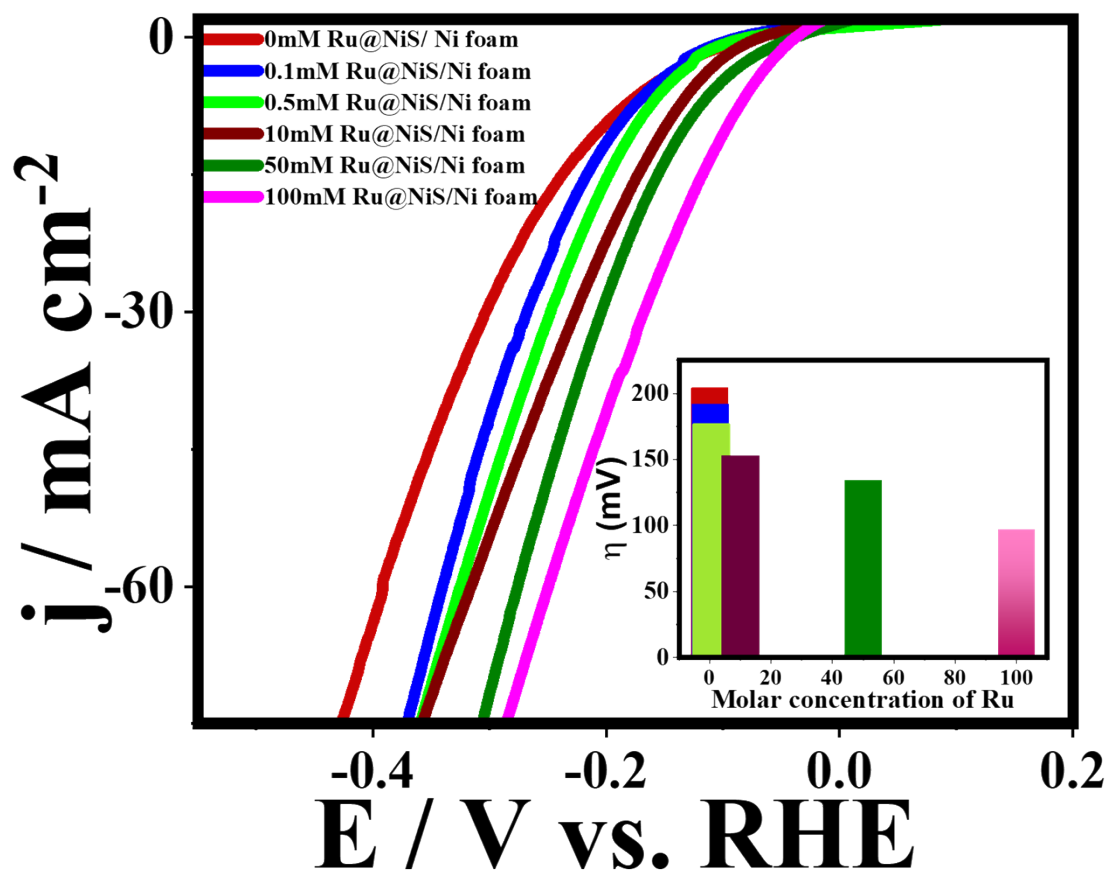

**Fig.S4.** LSVs of Ru@NiS (0mM, 0.1mM, 0.5mM, 10mM, 50mM & 100mM) in 1M KOH  
acquired with a scan rate of 5 mV s<sup>-1</sup>

### 8. Calculation for Electrochemical Active Surface Area

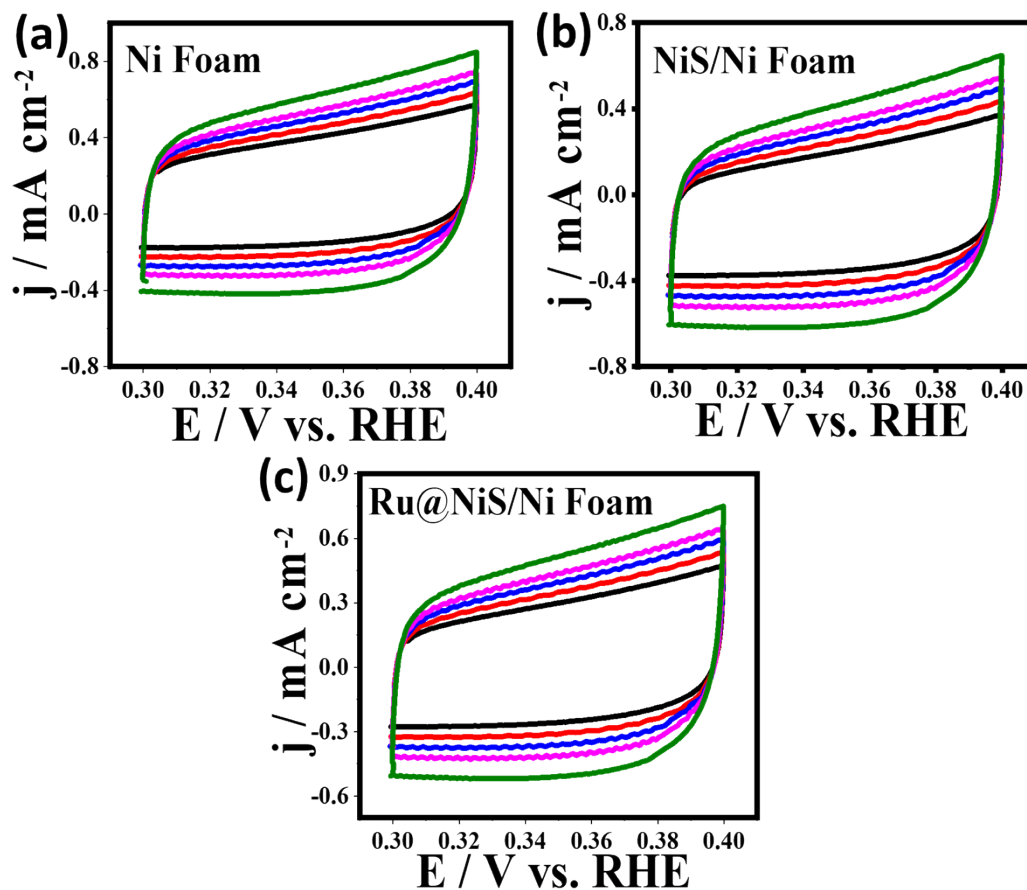

**Fig. S5.** (a-c) CVs of Ni foam, NiS/Ni foam and Ru@NiS/Ni foam with increasing scan rates from 20 mV/s to 100 mV/s in 1M KOH.

## 9. Comparison of admittance, phase angle and angular frequency

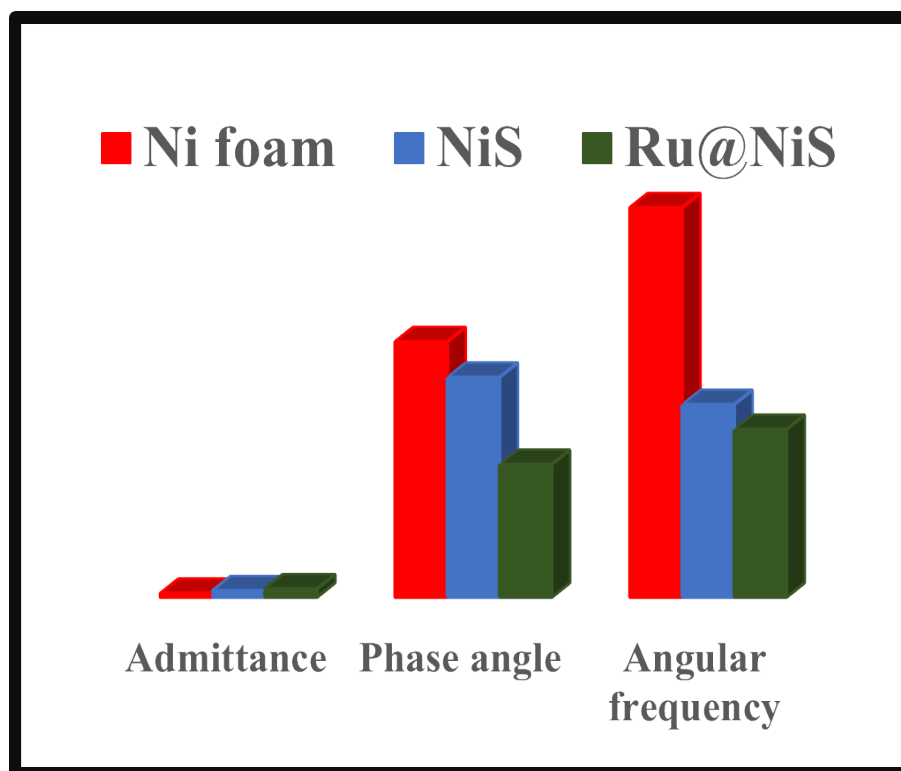

**Fig. S6.** Comparison representation of admittance, phase angle and angular frequency of Ni foam, NiS/Ni foam and Ru@NiS/Ni foam



## 10. Reproducibility of Ru@NiS/Ni Foam electrodes for HER:

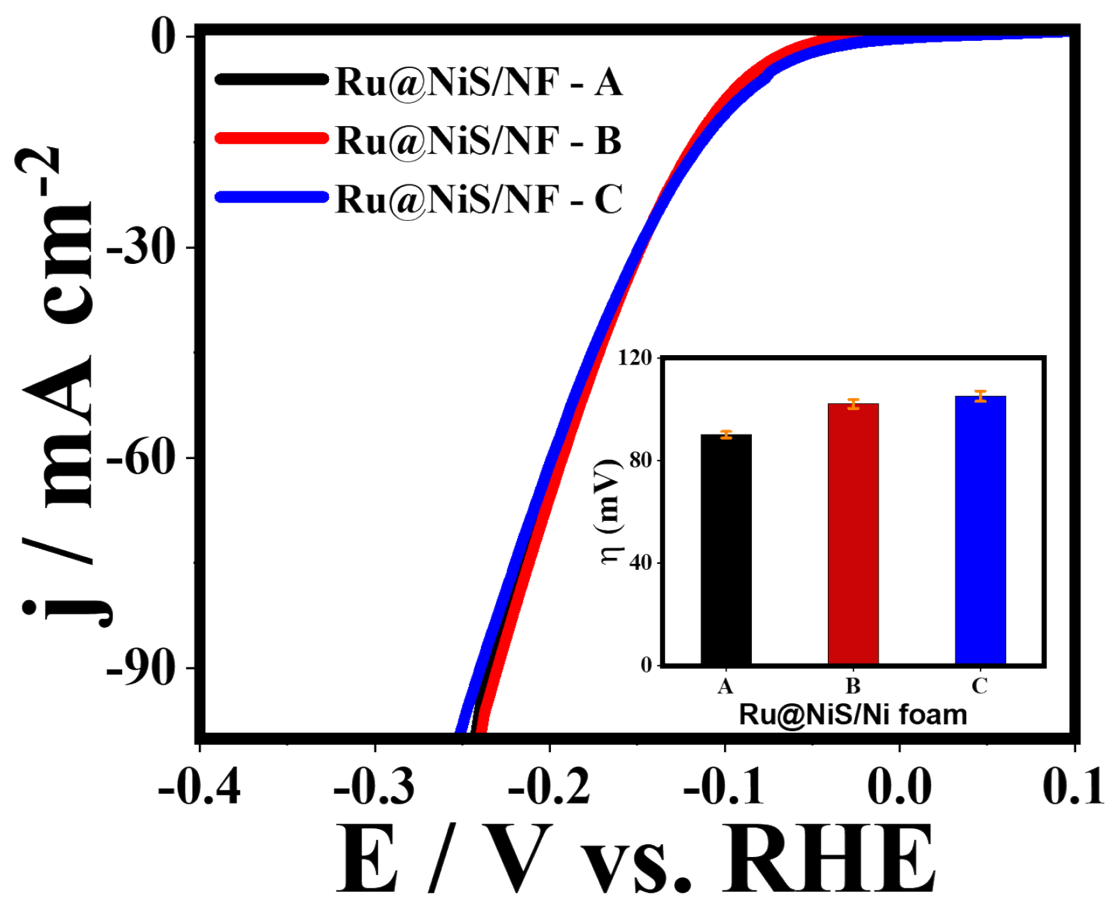

Fig. S7. LSVs of three brand new Ru@NiS/Ni Foam electrodes in 1M KOH.

(Inset: Reproducibility of overpotential of Ru@NiS/Ni Foam for HER)

## 11. Determination of Turn Over Frequency

At first, assuming each ruthenium atoms in the catalyst formed one active centre. The numbers of Ru atoms number in Ru@NiS/NF catalyst were calculated from the Ru molar mass and Ru concentration on Nickel foam, which derived from the XPS results. The Ru content of catalyst revealed by XPS measurement was 24.7%. Thus, the TOF the Ru@NiS/NF electrocatalyst was calculated according to the equation (3).

$$\text{TOF (H}_2 \text{ s}^{-1}) = \text{Total H}_2 \text{ turnovers per geometric area} / \text{Active sites per geometric area} \quad (3)$$

The number of total H<sub>2</sub> turnovers per geometric area was calculated from the current density (J) for the HER-LSV polarization:

$$\text{Total H}_2 \text{ turnovers per geometric area} = \text{J} \times \text{N}_A / \text{F} \times \text{n}$$

Where, j = current density, N<sub>A</sub> = Avogadro number, F = Faraday constant, n = Number of electrons

$$= 1.56 \times 10^{23} \text{ H}_2 \text{ s}^{-1} \text{ per mA/cm}^2 \quad (4)$$

$$\text{Active sites per geometric area} = 20 \text{ mM} \times 24.7\% \times 6.022 \times 10^{23}$$

$$= 29.7487 \times 10^{20} \text{ Ru site cm}^{-2} \quad (5)$$

Finally, the TOF of Ru@NiS/NF can be obtained via the current density from the HER- LSV polarization curves and according to (6):

$$\text{TOF}_{0.068\text{V}} = 1.56 \times 10^{23} / 29.7487 \times 10^{20} \quad (6)$$

$$= 0.00052 \times 10^5 \text{ s}^{-1}$$

$$= 52 \text{ s}^{-1}$$

## 12. Stability test

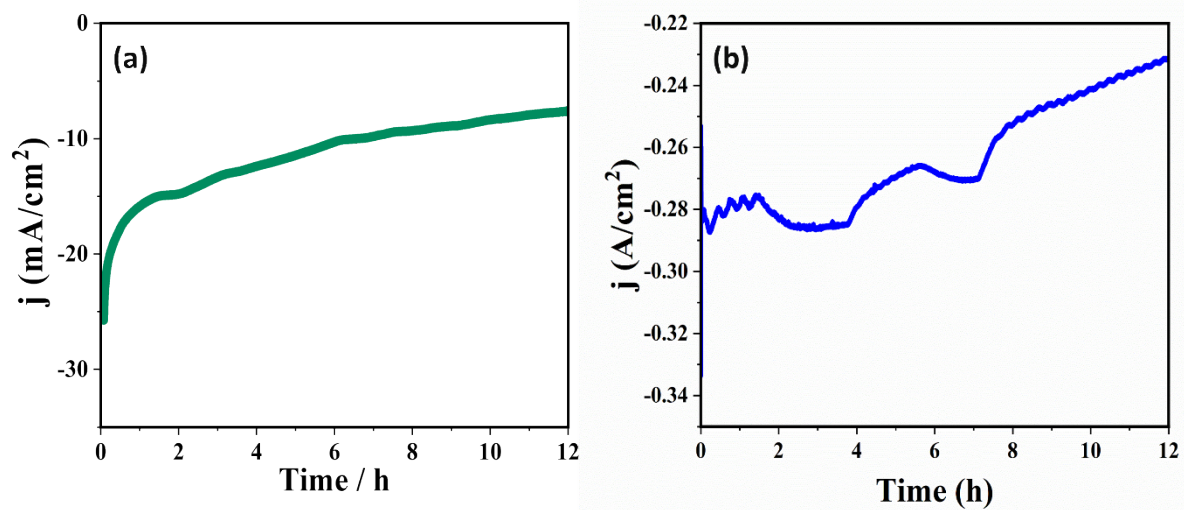

**Fig. S8.** CA response of Ru@NiS/Ni foam at (a) 1.2 V & (b) -2 V vs. Hg/HgO in 1 M KOH

### 13. Post reaction analysis

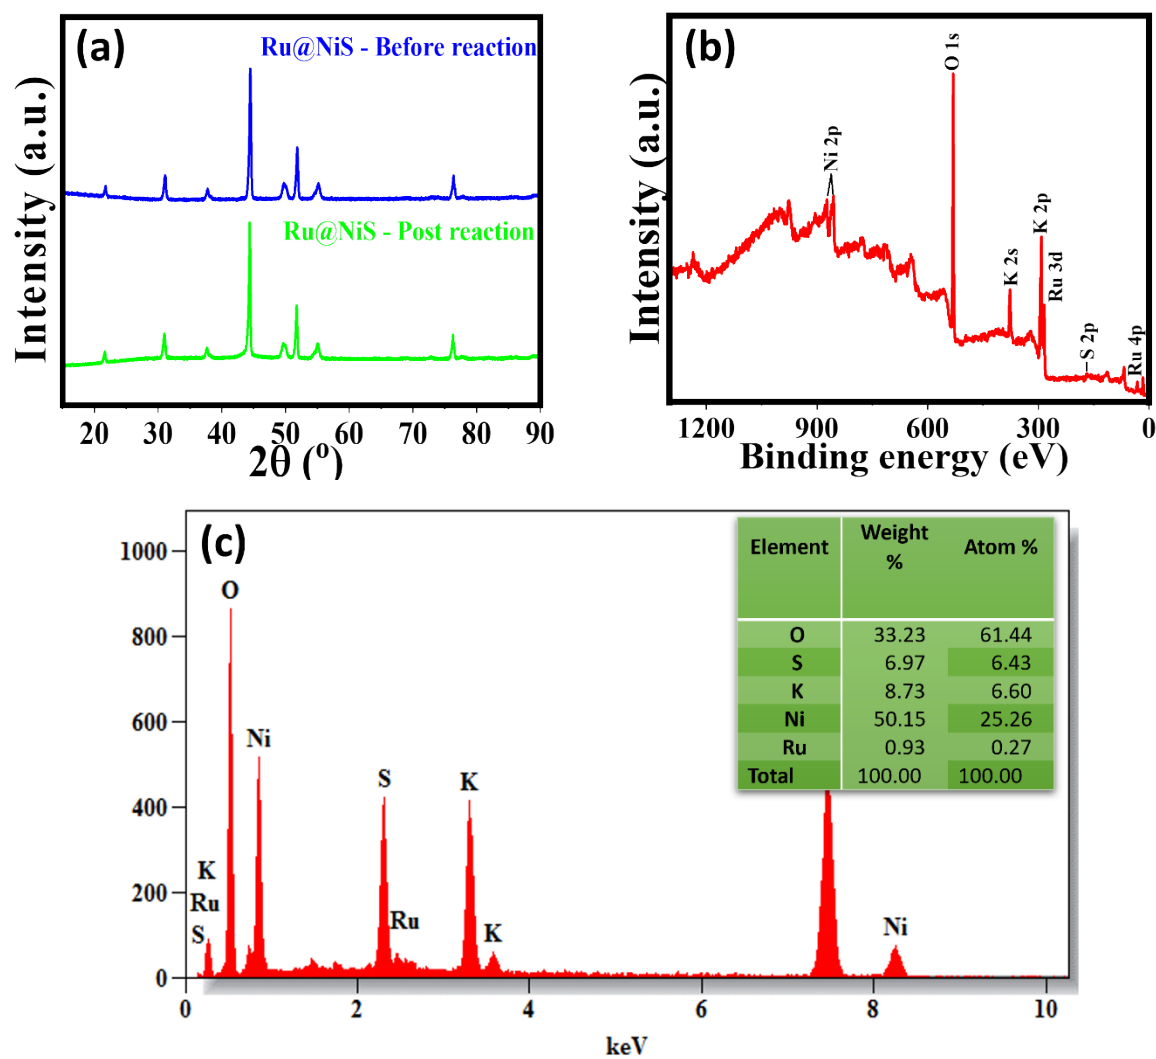

**Fig. S9.** (a) XRD of Ru@NiS/Ni foam before and after chronoamperometry, (b) XPS survey spectrum, (c) EDS spectrum and elemental composition of Ru@NiS/Ni foam after 12 hours of chronoamperometry test.

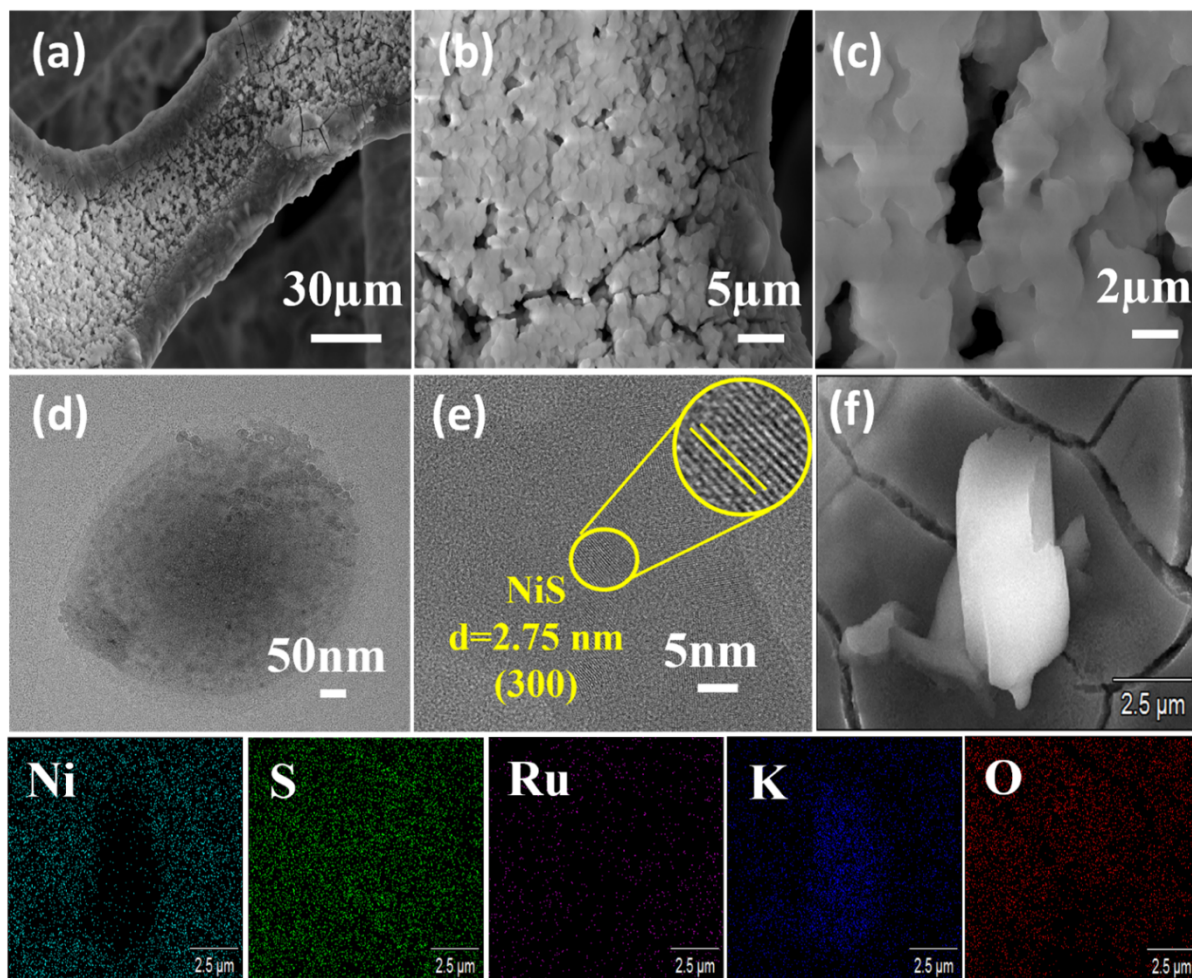

**Figure S10.** (a-c) SEM images. (d) TEM image and (e) HRTEM image. (f) SEM image of Ru@NiS/Ni foam where EDS were performed with corresponding mapping of elements after 12 hours of chronoamperometry towards HER.

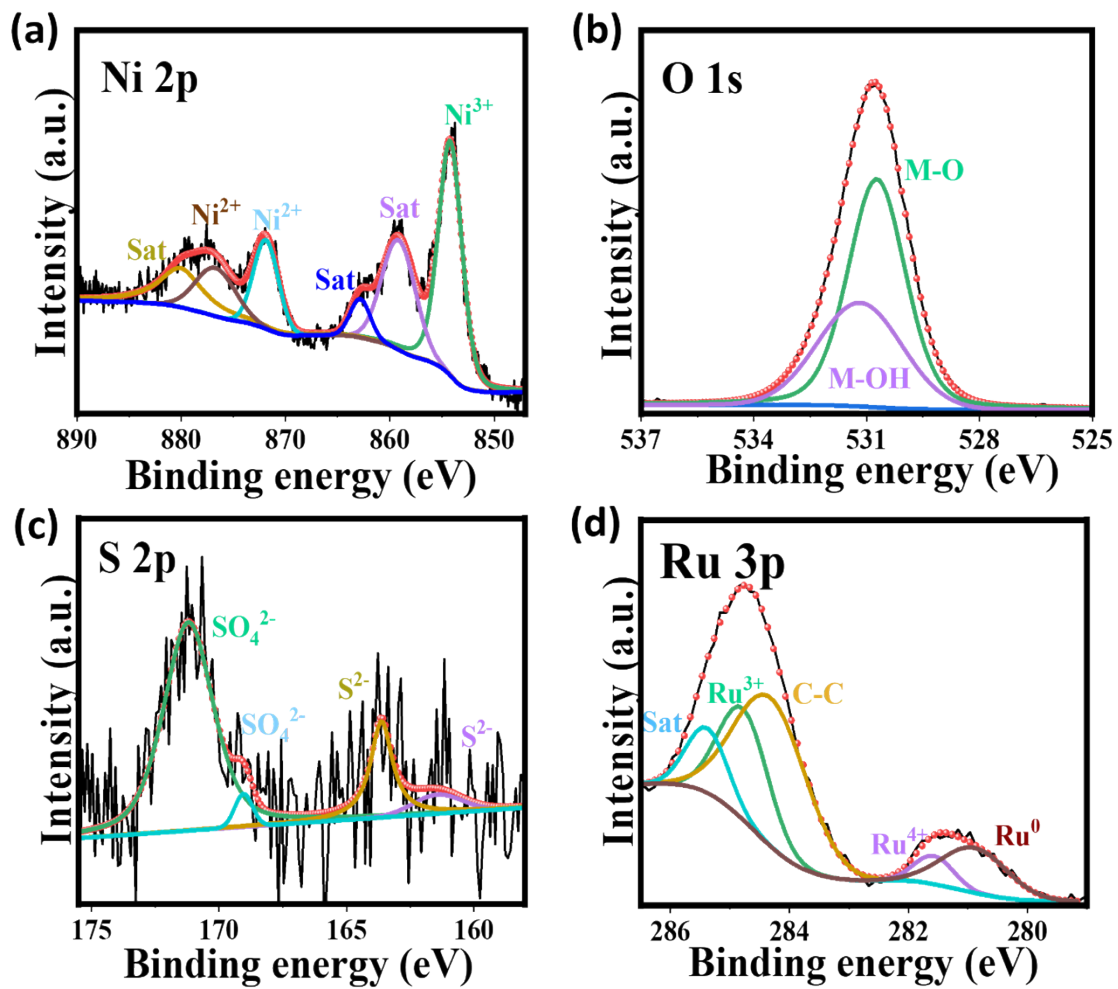

Figure S11. XPS spectra of (a) Ni 2p, (b) O1s, (c) S 2p & (d) Ru 3d in Ru@NiS/Ni foam after HER studies

**14. Comparison of HER activity of Ru@NiS/Ni foam with other recently reported Ni based electrocatalysts at 10 mA/cm<sup>2</sup> in alkaline medium.**

| Catalysts                                                                 | Overpotential<br>(mV)            | References |
|---------------------------------------------------------------------------|----------------------------------|------------|
| Ru@NiS/Ni foam                                                            | 68.8                             | This work  |
| Fe <sub>x</sub> Ni <sub>3-x</sub> S <sub>2</sub> @NF                      | 72                               | [S1]       |
| ReS <sub>2</sub> /NiS/NF                                                  | 78                               | [S2]       |
| Zn-Ni <sub>3</sub> S <sub>2</sub> /NF                                     | 78                               | [S3]       |
| Ni <sub>0.67</sub> Co <sub>0.33</sub> /Ni <sub>3</sub> S <sub>2</sub> @NF | 87                               | [S4]       |
| Vs-Ni <sub>3</sub> S <sub>2</sub> /NF                                     | 88                               | [S5]       |
| MoS <sub>2</sub> /Ni <sub>3</sub> S <sub>2</sub>                          | 89                               | [S6]       |
| Ni-S-OH/Ni foam                                                           | 110<br>@ 100 mA cm <sup>-2</sup> | [S7]       |
| NiS <sub>2</sub> /CoS <sub>2</sub> /MoS <sub>2</sub>                      | 112                              | [S8]       |
| MoCoNiS@NF                                                                | 114                              | [S9]       |
| Ni <sub>3</sub> S <sub>2</sub> /VG@NiCo<br>LDHs                           | 120                              | [S10]      |
| P-CoNi <sub>2</sub> S <sub>4</sub> YSSs                                   | 135                              | [S11]      |

|                                                                   |     |       |
|-------------------------------------------------------------------|-----|-------|
| NiWO <sub>4</sub> /Ni <sub>3</sub> S <sub>2</sub>                 | 136 | [S12] |
| Mo-NiP <sub>x</sub> /NiS <sub>y</sub>                             | 137 | [S13] |
| NiS <sub>2</sub> /MoS <sub>2</sub> /CNTs                          | 149 | [S14] |
| Cu <sub>2</sub> S-Ni <sub>3</sub> S <sub>2</sub> /NF              | 149 | [S15] |
| Ni/NiS/P,N,S-rGO                                                  | 155 | [S16] |
| CoNi <sub>2</sub> S <sub>4</sub> /g-C <sub>3</sub> N <sub>4</sub> | 160 | [S17] |
| Co-Ni <sub>3</sub> S <sub>2</sub>                                 | 192 | [S18] |
| Co-N-Ni <sub>3</sub> S <sub>2</sub> /Ni foam                      | 215 | [S19] |

## References

- S1. B. Fei, Z. Chen, J. Liu, H. Xu, X. Yan, H. Qing, M. Chen and R. Wu, *Advanced Energy Materials*, 2020, 10, 2001963–2001963.
- S2. Y. Liu, H. Zhang, Y. Zhang, W. Song, Z. Hou, G. Zhou, Z. Zhang and J. Liu, *Chemical Engineering Journal*, 2023, 451, 138905–138905.
- S3. W. He, H. Liu, J. Cheng, J. Mao, C. Chen, Q. Hao, J. Zhao, C. Liu, Y. Li and L. Liang, *Nanoscale*, 2021, 13, 10127–10132.
- S4. Z. Wu, Y. Feng, Z. Qin, X. Han, X. Zheng, Y. Deng and W. Hu, *Small*, 2022, 43, 2106904
- S5. D. Jia, L. Han, Y. Li, W. He, C. Liu, J. Zhang, C. Chen, H. Liu and H. L. Xin, *Journal of materials chemistry. A, Materials for energy and sustainability*, 2020, 8, 18207–18214.
- S6. J. Zhang, Y. Zheng, J. Wang, Y. Geng, B. Zhang, J. He, J. Xue, T. Frauenheim and M. Li, *Small*, 2021, 10, 2006730.
- S7. S. Anantharaj, H. Sugime and S. Noda, *Chemical Engineering Journal*, 2021, 408, 127275.
- S8. Y. Zhang, M. Shi, C. Wang, Y. Zhu, N. Li, X. Pu, A. Yu and J. Zhai, *Science Bulletin*, 2020, 65, 359–366.
- S9. R. He, Pitchai Thangasamy, J. Wu, K. Yu, X. Yu, W. Tang, D. Quiroz, Deema Alyones, Z.



- Chen, H. Luo and M. Zhou, *Electrochimica Acta*, 2023, 470, 143342–143342.
- S10. X. Zhang, J. Fan, X. Lu, Z. Han, C. Cazorla, L. Hu, T. Wu and D. Chu, *Chemical Engineering Journal*, 2021, 415, 129048.
- S11. X. Lu, Song Lin Zhang, Wei Lok Sim, S. Gao and W. David, *Angewandte Chemie International Edition*, 2021, 60, 22885–22891.
- S12. S. Huang, Y. Meng, Y. Cao, F. Yao, Z. He, X. Wang, H. Pan and M. Wu, *Applied Catalysis B: Environmental*, 2020, 274, 119120–119120.
- S13. J. Wang, M. Zhang, G. Yang, W. Song, W. Zhong, X. Wang, M. Wang and T. Sun, *Advanced Functional Materials*, DOI:<https://doi.org/10.1002/adfm.202101532>.
- S14. G.-L. Li, Y.-Y. Miao, X.-Y. Qiao, T.-Y. Wang and F. Deng, *Applied Surface Science*, 2023, 615, 156309–156309.
- S15. K. S. Bhat and H. S. Nagaraja, *ChemistrySelect*, 2020, 5, 2455–2464.
- S16. M. Barakat, Mohamed Reda Berber, Y. Yamauchi, Amir Pakdel, R. Cao and U.-P. Apfel, *ACS Applied Materials & Interfaces*, 2021, 13, 34043–34052.
- S17. R. Zahra, E. Pervaiz, M. M. Baig and O. Rabi, *Electrochimica Acta*, 2022, 418, 140346.
- S18. Y. Li, Y. Duan, K. Zhang and W. Yu, *Chemical Engineering Journal*, 2022, 433, 134472.
- S19. X. Du, G. Ma and X. Zhang, *Dalton Transactions*, 2021, 50, 8955–8962.
